# Supplementary material for: Construction of molecularly imprinted nanoplatforms with persistent luminescence for the in vitro specific adsorption and in vivo targeted regulation of food-borne biotoxins
Source: Royal Society of Chemistry journal article supplement (doi:10.1039/c9nj03231b), 2019-01-01
Supplement: c9nj03231b1.pdf [file c9nj03231b1.pdf]

## Supporting Information

### New Journal of Chemistry

# Construction of molecularly imprinted nanoplatfoms with persistent luminescence for in vitro specific adsorption and in vivo targeted regulation of food-borne biotoxins

*Jing-Min Liu<sup>1</sup>, Zhi-Hao Wang<sup>1</sup>, Chun-Yang Li, Shi-Wen Lv, Ning Zhao, and Shuo Wang\**

Tianjin Key Laboratory of Food Science and Health, School of Medicine, Nankai University,

Tianjin 300071, China.

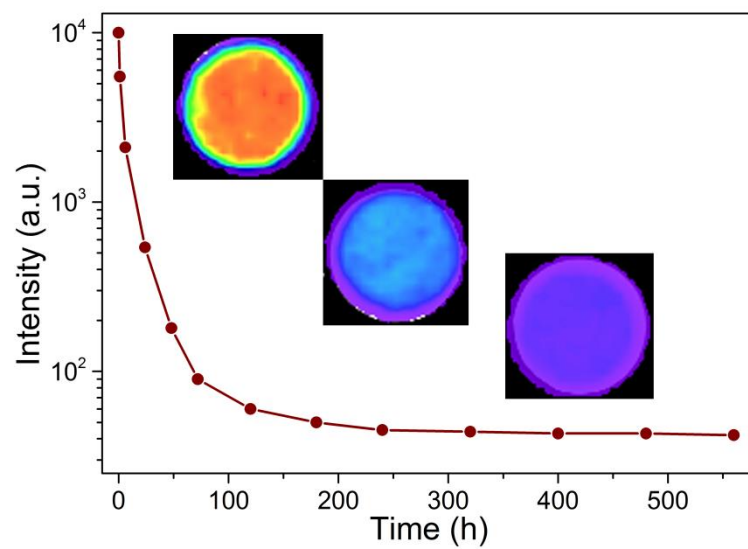

**Fig. S1** The long afterglow property of as-prepared PLNPs.

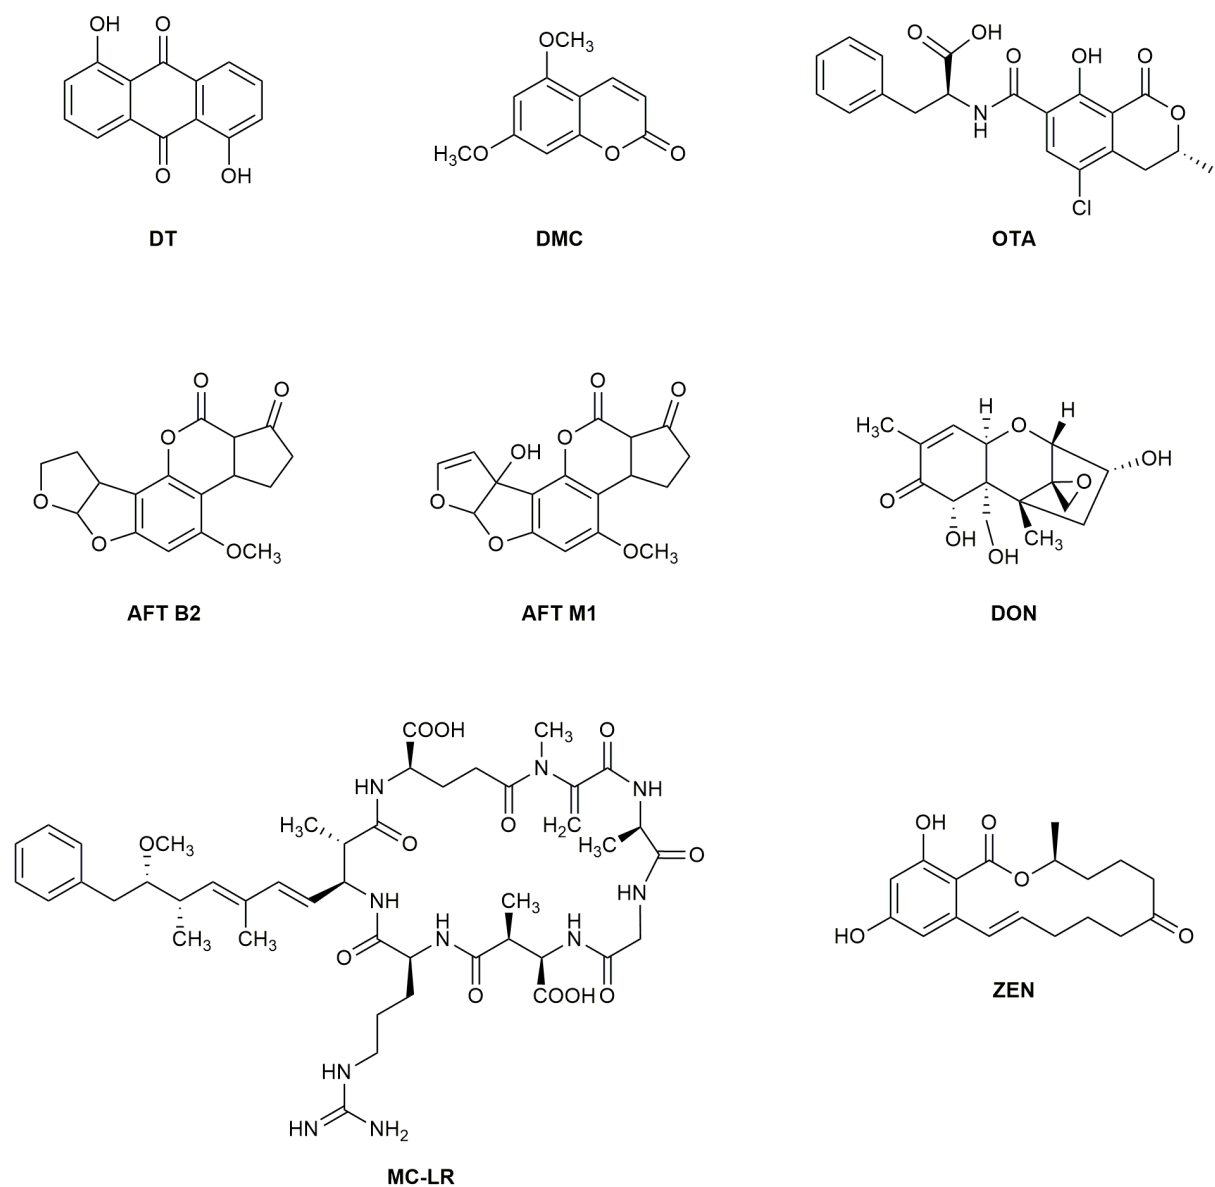

**Fig. S2** The chemical structures of three imprinting templates used and other common biotoxins.
